# Supplementary material for: Nusinersen demonstrates effectiveness in treating spinal muscular atrophy: findings from a three-year nationwide study in Korea
Source: Front Neurol. 2023 Dec 20;14:1294028. doi: 10.3389/fneur.2023.1294028 (PMC10773909; doi:10.3389/fneur.2023.1294028)
Supplement: Supplementary file 1 [file Table_1.XLSX]

## Sheet: Sheet1
Supplementary Table 1. Overview of motor score changes in all types of SMA patients enrolled in the study
Patient #	TYPE	SMN2	ONSET_Y	ONSET_INJ_Y	INJ_AGE_Y	CH0M	CH2M	CH6M	CH10M	CH14M	CH18M	CH22M	CH26M	CH30M	CH34M	CH38M	CH42M	CH46M	NUS0M	NUS2M	NUS6M	NUS10M	NUS14M	NUS18M	NUS22M	NUS26M	NUS30M	NUS34M	NUS38M	NUS42M
1	1	2	0.421918	6.30959	6.73151	0	0	0	0	0	1	1	1	1	1	1	1		0	0	0	0	0	1	1	1	1	1	1	1
2	1	2	0.345205	5.2137	5.5589	0	0	0	0	0	1	1	1	1	1	1	1		0	0	0	0	0	1	1	1	1	1	1	1
3	1	3	0.583562	3.73699	4.32055	0	5	6	7	8	7	7	7	8	8				6	11	12	13	14	13	13	13	14	14
4	1	3	0.241096	1.80822	2.04932	0	1	2	2	4	5	5	5	6	6	6	7	7	2	3	4	4	6	7	7	7	8	8	8	9
5	1	2	0.380822	1.53699	1.91781	0	0	3	6	8	9	10	12	12	12				5	8	8	11	13	14	15	17	17	17
6	1		0.39726	1.09315	1.49041	0	2	5	5	6	7	10	12	14					4	6	9	9	10	11	14	16	18
7	1	2	0.221918	0.150685	0.372603	0	3	2	3	6	9	10	16	17	17	17	18		0	3	2	3	6	9	10	16	17	17	17	18
8	1		0.331507	0.391781	0.723288	0	5	6	11	12	15	18	19	22	22				0	5	6	11	12	15	18	19	22	22
9	1	2	0.0246575	1.12329	1.14795	0	0	0											0	0	0
10	1		0.136986	0.361644	0.49863	0	2	5											1	3	6
11	1	2	0.254795	0.194521	0.449315	0	1	1											0	1	1
12	1	3	0.391781	0.172603	0.564384	0	0	3	7	11	11	13							3	3	6	10	14	14	16
13	1	2	0.0410959	0.0520548	0.0931507	0	2	3	8	11	15	17	17	17					0	2	3	8	11	15	17	17	17
14	1	3	0.372603	0.389041	0.761644	0	6	11	12										3	9	14	15
15	1	2	0.10137	0.238356	0.339726	0	2	4	12	14	14								1	3	5	13	15	15
16	1	2	0.0191781	0.142466	0.161644	0	0	1	3	5	8								1	1	2	4	6	9
17	1	2	0.227397	0.208219	0.435616	0	1	1	3	6	6								1	2	2	4	7	7
18	1	2	0.2	0.221918	0.421918	0	0	0	1	5									1	1	1	2	6
19	1	2	0.0876712	0.112329	0.2	0	1	1	6	7									1	2	2	7	8
20	1	2	0.0191781	0.238356	0.257534	0	0	1	5										2	2	3	7
21	1	1	0.641096	20.1973	20.8384	0	0	0	1	2	3	3							2	2	2	3	4	5	5
22	2	3	0.805479	0.60274	1.40822	0	5	5	6	9	11	12	13	13	13	13	13		3	8	8	9	12	14	15	16	16	16	16	16
23	2	3	0.665753	8.1726	8.83836	0	3	3	3	7	7	7	-2						10	13	13	13	17	17	17	8
24	2		0.923288	8.53151	9.45479	0	1	3	3	4	4								7	8	10	10	11	11
25	2		1	7.45205	8.45205	0	1	1	2	2	0	4	4						5	6	6	7	7	5	9	9
26	2	3	1.12329	7.11507	8.23836	0	14	16	16	16	16	16	16	17					8	22	24	24	24	24	24	24	25
27	2	3	0.99726	7.50411	8.50137	0	8	10	10	10	10	10	10						28	36	38	38	38	38	38	38
28	2		0.69863	6.17808	6.87671	0	4	4	4	4	4	4	5						0	4	4	4	4	4	4	5
29	2	3	1.1863	5.56986	6.75616	0	7	9	11	12	13	14	14	14					43	50	52	54	55	56	57	57	57
30	2	3	1.36438	5.55616	6.92055	0	3	3	3	3	4	4	4	4					17	20	20	20	20	21	21	21	21
31	2	3	1.43836	5.03836	6.47671	0	3	3	4	4	5	5	7	7	7				35	38	38	39	39	40	40	42	42	42
32	2	3	0.926027	5.63288	6.5589	0	2	2	2	2	2	3	3	3	3				4	6	6	6	6	6	7	7	7	7
33	2	3	1.40822	4.49589	5.90411	0	8	8	8	8	8	8	9						5	13	13	13	13	13	13	14
34	2	3	0.490411	5.35616	5.84658	0	0	1	1	2	2	2	2	2					3	3	4	4	5	5	5	5	5
35	2		1.12877	4.30137	5.43014	0	1	1	3	4	4	5	5						30	31	31	33	34	34	35	35
36	2	3	1.02466	4.33151	5.35616	0	2	2	2	2	2	3	3	3					6	8	8	8	8	8	9	9	9
37	2	3	0.479452	4.49863	4.97808	0	6	8	9	9	10	10	10						18	24	26	27	27	28	28	28
38	2		1.85479	2.83836	4.69315	0	1	1	0	0	0	0							39	40	40	39	39	39	39
39	2		1	3.84932	4.84932	0	4	5	5	5	5	5							10	14	15	15	15	15	15
40	2	3	1.79452	2.60274	4.39726	0	8	10	11	11	11	11	11	11	11				33	41	43	44	44	44	44	44	44	44
41	2	3	0.931507	3.13699	4.06849	0	2	4	5	5	5	6	6	6	6				16	18	20	21	21	21	22	22	22	22
42	2	3	0.693151	3.38082	4.07397	0	6	6	8	8	8	9	11	13	13				14	20	20	22	22	22	23	25	27	27
43	2	3	0.728767	3.1589	3.88767	0	0	4	3	6	6	7	7	7	7				8	8	12	11	14	14	15	15	15	15
44	2		1.16438	2.17808	3.34247	0	2	3	5	6	6	7	7						40	42	43	45	46	46	47	47
45	2		1	2.19452	3.19452	0	2	2	2	3	3	3	3						13	15	15	15	16	16	16	16
46	2	3	1.25479	2.09589	3.35068	0	9	9	9	10	10	11	11	11					12	21	21	21	22	22	23	23	23
47	2	3	1.52603	0.717808	2.24384	0	8	9	11	12	14	14	15	15					30	38	39	41	42	44	44	45	45
48	2	3	0.679452	1.36438	2.04384	0	4	5	6	7	7	7	12	13	14				4	8	9	10	11	11	11	16	17	18
49	2	3	1.1726	0.860274	2.03288	0	11	13	17	17	18	18	19	20					17	28	30	34	34	35	35	36	37
50	2	3	0.446575	1.6411	2.08767	0	2	4	8	9	10	12	13	17					15	17	19	23	24	25	27	28	32
51	2		1.37534	0.512329	1.88767	0	5	5	7	7	8	8	10						24	29	29	31	31	32	32	34
52	2		1.92877	15.2767	17.2055	0	0	0											4	4	4
53	2	3	0.632877	1.28219	1.91507	0	2	12	12	13	13								31	33	43	43	44	44
54	2		1.31233	0.424658	1.73699	0	2	6	8										11	13	17	19
55	2	3	1.12055	2.61644	3.73699	0	3	4	5	6	8	8	8						19	22	23	24	25	27	27	27
56	2	3	1.16438	16.9425	18.1068	0	0	0	0	0	0	0	0						2	2	2	2	2	2	2	2
57	2	3	0.832877	12.9836	13.8164	0	4	5	9	10	11	11	11	12					14	18	19	23	24	25	25	25	26
58	2	3	1.17808	32.074	33.2521	0	1	2	2	2	2	2	2						0	1	2	2	2	2	2	2
59	2	3	0.991781	22.7726	23.7644	0	5	5	5	6	6	6							0	5	5	5	6	6	6
60	2	3	1.49041	32.8219	34.3123	0	2	2	2	2	2	2	2						0	2	2	2	2	2	2	2
61	2	3	1.43288	26.6849	28.1178	0	3	3	4	4	4	5							3	6	6	7	7	7	8
62	2	3	1.49315	16.0438	17.537	0	4	6	6	6	6	7							3	7	9	9	9	9	10
63	2	2	1.00274	10.3315	11.3342	0	6	7	8	10	10	11	11						2	8	9	10	12	12	13	13
64	2		0.964384	27.4082	28.3726	0	5	3	4	5	5	5	5						2	7	5	6	7	7	7	7
65	2	3	0.947945	24.0986	25.0466	0	0	0	0	0									0	0	0	0	0
66	2	3	1.50685	9.70959	11.2164	0	3	7	8	9	11	11	12	12					14	17	21	22	23	25	25	26	26
67	2	3	0.871233	21.5973	22.4685	0	2	2	2	4	5	5	5	5					1	3	3	3	5	6	6	6	6
68	2		1	24.5452	25.5452	0	2	2	3	4	4	4							0	2	2	3	4	4	4
69	2	3	2.1589	19.1342	21.2932	0	2	3	3	3	3	3							0	2	3	3	3	3	3
70	2	3	0.476712	12.9863	13.463	0	1	1	1	1	1	1	1	1					3	4	4	4	4	4	4	4	4
71	2	3	0.778082	14.9397	15.7178	0	5	5	6	6	6	6							16	21	21	22	22	22	22
72	2		0.975342	21.5123	22.4877	0	1	2	4	5	5								2	3	4	6	7	7
73	2	3	1.32329	15.5425	16.8658	0	1	1	1	2	2	2							0	1	1	1	2	2	2
74	2	3	0.920548	22.811	23.7315	0	0	0	0										0	0	0	0
75	2		0.945205	19.0247	19.9699	0	0	0	0	0	0	1							6	6	6	6	6	6	7
76	2	4	0.986301	15.5945	16.5808	0	1	3	3	3	3	3	3						36	37	39	39	39	39	39	39
77	2	3	0.926027	24.6877	25.6137	0	2	2	3	3	3	3							2	4	4	5	5	5	5
78	2	3	1.12877	27.8466	28.9753	0	0	0	0	0									2	2	2	2	2
79	2		1.0274	15.2329	16.2603	0	3	1	5	5	6	8							16	19	17	21	21	22	24
80	2	3	0.479452	11.3096	11.789	0	0	1	1	1	1	1	2	2	2				4	4	5	5	5	5	5	6	6	6
81	2	3	1.23562	26.2658	27.5014	0	4	5	5	6	6	6							0	4	5	5	6	6	6
82	2	3	0.435616	8.8274	9.26301	0	2	2	2	2	2	2	2	2					2	4	4	4	4	4	4	4	4
83	2	3	1.93973	13.5151	15.4548	0	16	17	19	20	20	20	20	20					15	31	32	34	35	35	35	35	35
84	2	3	0.947945	14.9342	15.8822	0	2	3	3	5	6	6							0	2	3	3	5	6	6
85	2	3	0.452055	22.1671	22.6192	0	1	1	1	2	2	2	2						0	1	1	1	2	2	2	2
86	2	3	1	10.4904	11.4904	0	0	0	0	0	0	0	0	0					36	36	36	36	36	36	36	36	36
87	2	3	1.93973	11.874	13.8137	0	1	1	1	1	1	1							22	23	23	23	23	23	23
88	2		0.517808	10.3342	10.8521	0	2	2	2	-2	-1	-1	-2						2	4	4	4	0	1	1	0
89	2	3	0.578082	35.3315	35.9096	0	0	0	0	0	0	0							0	0	0	0	0	0	0
90	2	3	0.643836	11.4904	12.1342	0	8	8	8	9	9	9	9	9	9				13	21	21	21	22	22	22	22	22	22
91	2		0.915068	9.32877	10.2438	0	2	4	9	10	11	12	13						20	22	24	29	30	31	32	33
92	2		0.427397	30.1781	30.6055	0	0	0	0	0	0								0	0	0	0	0	0
93	2	3	1.21918	11.4521	12.6712	0	1	2	2	3	5	5	5	5					4	5	6	6	7	9	9	9	9
94	2	3	0.545205	13.8	14.3452	0	1	5	6	6	6	6	6						0	1	5	6	6	6	6	6
95	2	2	0.920548	10.1781	11.0986	0	8	9	11	12	13	14	14	14	15				9	17	18	20	21	22	23	23	23	24
96	2		2.91233	31.6329	34.5452	0	0	0	0	0	0	0							0	0	0	0	0	0	0
97	2	3	0.654795	22.2767	22.9315	0	0	0	0	0	0	1							0	0	0	0	0	0	1
98	2	3	0.928767	15.9836	16.9123	0	1	1	1	1	1	1							4	5	5	5	5	5	5
99	2	3	0.789041	22.937	23.726	0	0	1											0	0	1
100	2	3	0.830137	16.0137	16.8438	0	0	1	1	1									7	7	8	8	8
101	2	3	1	38.9534	39.9534	0	1	1											44	45	45
102	2	3	1.66849	9.85479	11.5233	0	-4	6	0	0	1	1	1	1					32	28	38	32	32	33	33	33	33
103	2	3	0.783562	28.7699	29.5534	0	0	0	0	0									0	0	0	0	0
104	2	3	0.868493	19.3123	20.1808	0	1	1	1	1	1	1							6	7	7	7	7	7	7
105	2		1.52329	15.3616	16.8849	0	1	1	2	2	3	4	4						6	7	7	8	8	9	10	10
106	2		1.25479	15.6795	16.9342	0	1	2	3	5	6	9	9						29	30	31	32	34	35	38	38
107	2	3	0.950685	9.8274	10.7781	0	0	0	1	1	1	2	2	2					4	4	4	5	5	5	6	6	6
108	2	3	0.59726	29.5507	30.1479	0	1	1	1	1	1	1							2	3	3	3	3	3	3
109	2	3	0.893151	28.0575	28.9507	0	0	0	0	0	0								0	0	0	0	0	0
110	2	3	0.945205	34.8301	35.7753	0	0	0	1										1	1	1	2
111	2	3	1.79178	8.32877	10.1205	0	4	7	10	11	12	12	12	12					7	11	14	17	18	19	19	19	19
112	2		0.857534	17.674	18.5315	0	0	0	0	0	0	0							0	0	0	0	0	0	0
113	2	3	0.463014	9.84932	10.3123	0	2	2	3	3	3	3	3						4	6	6	7	7	7	7	7
114	2		1.21918	8.1726	9.39178	0	5	5	5	5	5	6	6						8	13	13	13	13	13	14	14
115	2	3	2.61644	9.35068	11.9671	0	2	2	2	2	2	2	2	2					0	2	2	2	2	2	2	2	2
116	2	3	1.40274	18.1178	19.5205	0	1	1	1	1	1	1							2	3	3	3	3	3	3
117	2	3	0.964384	19.0082	19.9726	0	0	0	0	0									4	4	4	4	4
118	2	3	0.8	32.0411	32.8411	0	2	2	2										1	3	3	3
119	2	3	1.23288	24.6521	25.8849	0	0	1	1	1	2	2	2						6	6	7	7	7	8	8	8
120	2	3	1.46301	8.73973	10.2027	0	9	10	10	10	10	10	10	10	10				2	11	12	12	12	12	12	12	12	12
121	2	3	0.926027	24.063	24.989	0	1	1	2	3	3	3	5						1	2	2	3	4	4	4	6
122	2	2	0.69589	16.6795	17.3753	0	1	2	3	3	3	4							3	4	5	6	6	6	7
123	2	3	0.783562	38.6274	39.411	0	2	2	2	2	2	2							2	4	4	4	4	4	4
124	2	3	1.1726	24.6247	25.7973	0	3	3	3	4	4	4	4						2	5	5	5	6	6	6	6
125	3	3	0.942466	6.16164	7.10411	0	1	4	6	6	6	6	6	6					53	54	57	59	59	59	59	59	59
126	3		1.08493	5.98356	7.06849	0	5	7	8	10	10	10							19	24	26	27	29	29	29
127	3		1.47671	46.2137	47.6904	0	0	0	1	2									9	9	9	10	11
128	3	3	2.29041	20.4438	22.7342	0	11	11	11	11	11	12	12	12					4	15	15	15	15	15	16	16	16
129	3		0.945205	28.5233	29.4685	0	4	5											3	7	8
130	3	3	1.6411	14.0438	15.6849	0	0	0	0	0									8	8	8	8	8
131	3	3	0.821918	39.9753	40.7973	0	0	0	2	2	2	2							12	12	12	14	14	14	14
132	3		1.8411	22.9507	24.7918	0	6	7	10	10	9								36	42	43	46	46	45
133	3	3	1.08219	15.3151	16.3973	0	2	2	3	3	3	3	3	3	3				39	41	41	42	42	42	42	42	42	42
134	3	3	1.65479	22.6521	24.3068	0	0	1	1	1	1	1	1						4	4	5	5	5	5	5	5
135	3		1.93699	35.5397	37.4767	0	8	5	-8	4	6	8	5						48	56	53	40	52	54	56	53
136	3	3	0.980822	20.1041	21.0849	0	0	0	0	0	0	0	0						4	4	4	4	4	4	4	4
137	3		0.964384	21.9315	22.8959	0	0	0	1	2	3	4							2	2	2	3	4	5	6
*CH: changes from baseline
*NUS: nusinersen treatment month
*SMN2: SMN2 copy numbers
ONSET_Y: Onset age in years
ONSET_INJ_Y: Onset to injection period in years
INJ_AGE_Y: Injection starting age
HINE-2 scores were used for type 1 patients, and HFMSE scores were used for types 2, 3 patients
