# Supplementary material for: Nusinersen demonstrates effectiveness in treating spinal muscular atrophy: findings from a three-year nationwide study in Korea
Source: Front Neurol. 2023 Dec 20;14:1294028. doi: 10.3389/fneur.2023.1294028 (PMC10773909; doi:10.3389/fneur.2023.1294028)
Supplement: Supplementary file 2 [file Table_2.XLSX]

## Sheet: Sheet1
Supplementary Table 2. HFMSE score changes in type 2 patients with 0% baseline HFMSE score
Patient #	TYPE	SMN2	ONSET_Y	ONSET_INJ_Y	INJ_AGE_Y	CH0M	CH2M	CH6M	CH10M	CH14M	CH18M	CH22M	CH26M	CH30M	CH34M	CH38M	CH42M	CH46M	NUS0M	NUS2M	NUS6M	NUS10M	NUS14M	NUS18M	NUS22M	NUS26M	NUS30M	NUS34M	NUS38M	NUS42M
28	2		0.69863	6.17808	6.87671	0	4	4	4	4	4	4	5						0	4	4	4	4	4	4	5
58	2	3	1.17808	32.074	33.2521	0	1	2	2	2	2	2	2						0	1	2	2	2	2	2	2
59	2	3	0.991781	22.7726	23.7644	0	5	5	5	6	6	6							0	5	5	5	6	6	6
60	2	3	1.49041	32.8219	34.3123	0	2	2	2	2	2	2	2						0	2	2	2	2	2	2	2
65	2	3	0.947945	24.0986	25.0466	0	0	0	0	0									0	0	0	0	0
68	2		1	24.5452	25.5452	0	2	2	3	4	4	4							0	2	2	3	4	4	4
69	2	3	2.1589	19.1342	21.2932	0	2	3	3	3	3	3							0	2	3	3	3	3	3
73	2	3	1.32329	15.5425	16.8658	0	1	1	1	2	2	2							0	1	1	1	2	2	2
74	2	3	0.920548	22.811	23.7315	0	0	0	0										0	0	0	0
81	2	3	1.23562	26.2658	27.5014	0	4	5	5	6	6	6							0	4	5	5	6	6	6
84	2	3	0.947945	14.9342	15.8822	0	2	3	3	5	6	6							0	2	3	3	5	6	6
85	2	3	0.452055	22.1671	22.6192	0	1	1	1	2	2	2	2						0	1	1	1	2	2	2	2
89	2	3	0.578082	35.3315	35.9096	0	0	0	0	0	0	0							0	0	0	0	0	0	0
92	2		0.427397	30.1781	30.6055	0	0	0	0	0	0								0	0	0	0	0	0
94	2	3	0.545205	13.8	14.3452	0	1	5	6	6	6	6	6						0	1	5	6	6	6	6	6
96	2		2.91233	31.6329	34.5452	0	0	0	0	0	0	0							0	0	0	0	0	0	0
97	2	3	0.654795	22.2767	22.9315	0	0	0	0	0	0	1							0	0	0	0	0	0	1
99	2	3	0.789041	22.937	23.726	0	0	1											0	0	1
103	2	3	0.783562	28.7699	29.5534	0	0	0	0	0									0	0	0	0	0
109	2	3	0.893151	28.0575	28.9507	0	0	0	0	0	0								0	0	0	0	0	0
112	2		0.857534	17.674	18.5315	0	0	0	0	0	0	0							0	0	0	0	0	0	0
115	2	3	2.61644	9.35068	11.9671	0	2	2	2	2	2	2	2	2					0	2	2	2	2	2	2	2	2
*CH: changes from baseline
*NUS: nusinersen treatment month
*SMN2: SMN2 copy numbers
ONSET_Y: Onset age in years
ONSET_INJ_Y: Onset to injection period in years
INJ_AGE_Y: Injection starting age
