# Supplementary material for: Nusinersen demonstrates effectiveness in treating spinal muscular atrophy: findings from a three-year nationwide study in Korea
Source: Front Neurol. 2023 Dec 20;14:1294028. doi: 10.3389/fneur.2023.1294028 (PMC10773909; doi:10.3389/fneur.2023.1294028)
Supplement: Supplementary file 3 [file Table_3.XLSX]

## Sheet: Sheet1
Supplementary table 3. Summary of high (Baseline HFMSE score ≥35) and low (Baseline HFMSE score <35) groups based on the baseline HFMSE scores
	Low (Baseline HFMSE <35)			High (Baseline HFMSE ≥35)
	Mean	SD	N	Mean	SD	N
CH6M	2.70103	3.17597	97	2.83333	3.25064	6
CH10M	3.49485	3.55939	97	4.16667	4.16733	6
CH14M	4.14737	4.02907	95	4.5	4.54973	6
CH18M	4.65934	4.29785	91	4.66667	4.88535	6
CH22M	5.22093	4.48107	86	5	5.2915	6
CH26M	5.64198	4.50363	81	6	5.24404	5
CH30M	6.92982	5.09502	57	6.66667	7.02377	3
CH34M	8.74194	5.86497	31
