# Supplementary material for: Nusinersen demonstrates effectiveness in treating spinal muscular atrophy: findings from a three-year nationwide study in Korea
Source: Front Neurol. 2023 Dec 20;14:1294028. doi: 10.3389/fneur.2023.1294028 (PMC10773909; doi:10.3389/fneur.2023.1294028)
Supplement: Supplementary file 4 [file Table_4.XLSX]

## Sheet: Sheet1
Supplementary Table 4. Summary of motor function scores in different types of SMA
Type 1
	Time (Months)	0	2	6	10	14	18	22	26	30	34
	N	21	21	21	18	16	14	11	9	9	7
HINE-2 score	mean	1.6	3.2	4.2	6.9	8.3	9.7	10.6	11.9	12.8	11.4
	sd	1.7	3	3.9	4.6	4.7	5	6.2	7.1	7.6	8.3
	min	0	0	0	0	0	1	1	1	1	1
	max	6	11	14	15	15	15	18	19	22	22
Change frome baseline in HINE-2 score	mean	0	1.5	2.6	5.1	6.6	7.9	8.6	10	10.9	9.6
	sd	0	1.9	2.8	3.9	4.1	4.7	5.9	6.8	7.4	7.9
	min	0	0	0	0	0	1	1	1	1	1
	max	0	6	11	12	14	15	18	19	22	22
Type 2
	Time (Months)	0	2	6	10	14	18	22	26	30	34
	N	103	103	103	100	96	91	86	61	33	12
HFMSE score	mean	9.6	12.3	13.1	13.6	14.3	15.2	15.8	19	21.6	21.3
	sd	11.7	12.7	13.3	13.3	13.5	13.8	13.7	14.3	14.1	12
	min	0	0	0	0	0	0	0	0	2	6
	max	44	50	52	54	55	56	57	57	57	44
Change frome baseline in HFMSE score	mean	0	2.7	3.5	4.1	4.6	5.2	5.6	6.9	8.6	9.2
	sd	0	3.1	3.5	4	4.3	4.5	4.6	5.1	6	4.3
	min	0	-4	0	0	-2	-1	-1	-2	0	2
	max	0	16	17	19	20	20	20	20	20	15
Type 3
	Time (Months)	0	2	6	10	14	18	22	26	30	34
	N	13	13	13	12	12	10	9	6	3	1
HFMSE score	mean	18.5	21.4	21.8	22.8	24.1	27.2	25.7	29.8	39	42
	sd	18.6	19.8	19.8	19.3	20.5	21.4	21.9	24.5	21.7
	min	2	2	2	3	4	4	4	4	16	42
	max	53	56	57	59	59	59	59	59	59	42
Change frome baseline in HFMSE score	mean	0	2.8	3.2	2.9	4.3	5.1	5.1	4.5	7	3
	sd	0	3.7	3.6	5.2	4	3.9	4.2	4.3	4.6
	min	0	0	0	-8	0	0	0	0	3	3
	max	0	11	11	11	11	11	12	12	12	3
